# Supplementary material
Source: PubMed Central journal article supplement (PMC3280436)
Supplement: 97320630007379S1.pdf [file 97320630007379S1.pdf]

## Supplementary material:

**Table 1:** List of the apicoplast associated drug targets of *Toxoplasma gondii* ME49 having pathogen specific unique biochemical pathways

| Sl. No | Drug Target Name                       | Predicted Function                                            |
|--------|----------------------------------------|---------------------------------------------------------------|
| 1      | Mov34/MPN/PAD-1 domain                 | It acts as a regulatory submit of 26 proteasome               |
| 2      | Thioredoxin reductase                  | It reduces thioredoxin using NADPH                            |
| 3      | Succinyl Co-A ligase                   | It is a ADP-forming beta subunit                              |
| 4      | RNA binding                            | It is involved in Post-transcriptional events                 |
| 5      | Long chain fatty acid CoA ligase       | It catalyses bio-activation of fatty acids                    |
| 6      | Heat shock protein 90((Putative)       | It has molecular Chaperon activity                            |
| 7      | 60S Ribosomal protein L23(Putative)    | It is involved in Binding activity                            |
| 8      | Hypothetical protein TGME49_112400     | No definite function could be identified                      |
| 9      | Signal Recognition particle 54 kda     | The protein is involved in rRNA modification guide activity   |
| 10     | L-isoaspartate O-methyl transferase    | This protein recognises & catalyses the repair of damaged DNA |
| 11     | Pyruvate Kinase                        | It is involved in Glycolysis                                  |
| 12     | Succinate- semi aldehyde dehydrogenase | It catalyses metabolic reactions of fatty acids               |
| 13     | DNA polymerase delta catalytic subunit | It is involved in DNA replication and repair                  |
| 14     | Actin -like family protein ARP4a       | It has ATPase activity                                        |
| 15     | Ras family domain                      | It acts as potential tumour suppressor                        |
| 16     | 5-aminolevulinic acid synthase         | It possess pyridoxal phosphate binding                        |
| 17     | Ankyrin repeat                         | It has a mediatory role in protein-protein interactions       |
| 18     | Kelch motif domain                     | It is involved in cell fusion mechanism                       |

**Table 2:** Fold based modeling of selected proteins using fold -recognition based computational tool Phyre2 (Protein Homology/analogY Recognition Engine V 2.0). Selected template, Coverage, residues aligned fold descriptor, and super family for each protein are given

| Protein                               | SCOP Code/protein PDBID | Coverage (%) | Residues aligned | Fold/PDB descriptor            | Super family          | Family                |
|---------------------------------------|-------------------------|--------------|------------------|--------------------------------|-----------------------|-----------------------|
| Long chain fatty acid CoA ligase      | d1pg4a_                 | 95 %         | Residues 23-739  | Acetyl-CoA synthetase-like     | Acetyl CoA synthetase | Acetyl-CoA synthetase |
| Succinate-semi aldehyde dehydrogenase | c3ed6B_                 | 97%          | Residues 14-565  | Betaine aldehyde dehydrogenase | Oxidoreductase        | Oxidoreductase        |
